# Supplementary material for: Identification of Common Hub Genes in Human Dermal Fibroblasts Stimulated by Mechanical Stretch at Both the Early and Late Stages
Source: Front Surg. 2022 Apr 18;9:846161. doi: 10.3389/fsurg.2022.846161 (PMC9058084; doi:10.3389/fsurg.2022.846161)
Supplement: Supplementary file 2 [file Table_2.XLSX]

## Sheet: 5h-GO
Supplement Table 2. Corresponding data of Figure 4A
ID	Description	GeneRatio	BgRatio	pvalue	p.adjust	qvalue	geneID	Count
GO:0035967	Cellular response to topologically incorrect protein	10/264	166/18866	0.000119161	0.158433	0.156258	RNF185/DERL1/HERPUD2/HSPB8/HYOU1/HERPUD1/BAG3/DNAJB9/HSPA8/TPP1	10
GO:0010506	Regulation of autophagy	15/264	347/18866	0.000119249	0.158433	0.156258	FOXK1/PHF23/PRKAG3/ATP6V1H/HSPB8/TLK2/HUWE1/BAG3/VDAC1/PSAP/PRKAB1/NPC1/MEFV/EEF1A1/ATP6V1B2	15
GO:0014874	Response to stimulus involved in regulation of muscle adaptation	3/264	14/18866	0.000879677	0.388691	0.383354	PRKAG3/UTRN/DAG1	3
GO:0061684	Chaperone-mediated autophagy	3/264	16/18866	0.00132562	0.512517	0.505479	BAG3/HSPA8/EEF1A1	3
GO:0006304	DNA modification	7/264	120/18866	0.00150738	0.518037	0.510923	TET1/TREX1/ASCC3/CTCF/PRMT5/DNMT3A/PARP1	7
GO:0031396	Regulation of protein ubiquitination	9/264	211/18866	0.00297902	0.707222	0.69751	PHF23/DERL1/HUWE1/HERPUD1/N4BP1/UBE2N/SOX4/PSMD10/DNAJA1	9
GO:0046034	ATP metabolic process	11/264	311/18866	0.0045458	0.707222	0.69751	FOXK1/CYCS/PRKAG3/TREX1/NUP93/SDHD/PGAM1/LDHA/HSPA8/ATP6V1B2/PARP1	11
GO:0022412	Cellular process involved in reproduction in multicellular organism	12/264	375/18866	0.00679032	0.707222	0.69751	TMEM95/ASPM/NOBOX/JAM3/WDR77/AFF4/ABHD2/QKI/TOP2A/ETV6/DNMT3A/ACVR1	12
GO:2001020	Regulation of response to DNA damage stimulus	8/264	226/18866	0.0145101	0.707222	0.69751	FIGNL2/SPRED2/POT1/TRIM32/AXIN2/UBE2N/PSMD10/PARP1	8
GO:0042769	DNA damage response, detection of DNA damage	3/264	38/18866	0.0159329	0.707222	0.69751	TREX1/SOX4/PARP1	3
GO:2001028	Positive regulation of endothelial cell chemotaxis	2/264	15/18866	0.0181657	0.707222	0.69751	LGMN/FGF2	2
GO:0048713	Regulation of oligodendrocyte differentiation	3/264	40/18866	0.0182842	0.707222	0.69751	PRMT5/WDR1/DAG1	3
GO:0048024	Regulation of mrna splicing, via spliceosome	5/264	113/18866	0.0213761	0.707222	0.69751	DDX17/WTAP/QKI/SON/HSPA8	5
GO:1903539	Protein localization to postsynaptic membrane	3/264	44/18866	0.0235343	0.707222	0.69751	IQSEC2/STX3/DAG1	3
GO:1904707	Positive regulation of vascular associated smooth muscle cell proliferation	3/264	50/18866	0.0327779	0.707222	0.69751	LDLRAP1/MEF2D/FGF2	3
GO:0046716	Muscle cell cellular homeostasis	2/264	21/18866	0.0343934	0.707222	0.69751	TRIM32/BAG3	2
GO:0050920	Regulation of chemotaxis	7/264	229/18866	0.0426666	0.707222	0.69751	JAM3/ZSWIM4/STX3/LGMN/SERPINE1/FGF2/C3AR1	7
GO:0001672	Regulation of chromatin assembly or disassembly	2/264	26/18866	0.0508663	0.707222	0.69751	TET1/TLK2	2
GO:0050921	Positive regulation of chemotaxis	5/264	144/18866	0.0520489	0.707222	0.69751	STX3/LGMN/SERPINE1/FGF2/C3AR1	5
GO:0071103	DNA conformation change	9/264	355/18866	0.0628076	0.707222	0.69751	TET1/HP1BP3/POT1/TREX1/ASCC3/CTCF/TOP2A/DNMT3A/PARP1	9

## Sheet: 5h-KEGG
Supplement Table 2. Corresponding data of Figure 4B
ID	Description	GeneRatio	BgRatio	pvalue	p.adjust	qvalue	geneID	Count
hsa00240	Pyrimidine metabolism	4/120	58/8112	0.010452	0.624152	0.624152	CMPK1/RRM2/TYMP/DCTD	4
hsa04710	Circadian rhythm	3/120	31/8112	0.0104948	0.624152	0.624152	PRKAG3/BHLHE40/PRKAB1	3
hsa04141	Protein processing in endoplasmic reticulum	7/120	171/8112	0.0132672	0.624152	0.624152	RNF185/DERL1/HYOU1/SEC23B/HERPUD1/HSPA8/DNAJA1	7
hsa03020	RNA polymerase	3/120	34/8112	0.0135312	0.624152	0.624152	POLR1D/POLR3F/POLR2B	3
hsa04210	Apoptosis	6/120	136/8112	0.0152954	0.624152	0.624152	TUBA3D/DIABLO/CYCS/MAP2K1/LMNB1/PARP1	6
hsa04371	Apelin signaling pathway	6/120	139/8112	0.016869	0.624152	0.624152	PRKAG3/MAP2K1/PRKAB1/SERPINE1/MEF2D/LIPE	6
hsa04721	Synaptic vesicle cycle	4/120	78/8112	0.0280893	0.756201	0.756201	ATP6V1H/VAMP2/STX3/ATP6V1B2	4
hsa04979	Cholesterol metabolism	3/120	50/8112	0.0374076	0.756201	0.756201	LDLRAP1/VDAC1/NPC1	3
hsa04142	Lysosome	5/120	132/8112	0.0457441	0.756201	0.756201	ATP6V1H/PSAP/LGMN/NPC1/TPP1	5
hsa00190	Oxidative phosphorylation	5/120	134/8112	0.0482578	0.756201	0.756201	CYCS/ATP6V1H/SDHD/PPA1/ATP6V1B2	5
hsa04910	Insulin signaling pathway	5/120	137/8112	0.0521795	0.756201	0.756201	PRKAG3/MAP2K1/PRKAB1/LIPE/ELK1	5
hsa04213	Longevity regulating pathway - multiple species	3/120	62/8112	0.0636466	0.756201	0.756201	PRKAG3/PRKAB1/HSPA8	3
hsa04623	Cytosolic DNA-sensing pathway	3/120	63/8112	0.0661353	0.756201	0.756201	POLR1D/TREX1/POLR3F	3
hsa04922	Glucagon signaling pathway	4/120	107/8112	0.0737452	0.756201	0.756201	PRKAG3/PRKAB1/PGAM1/LDHA	4
hsa00010	Glycolysis / Gluconeogenesis	3/120	67/8112	0.0765271	0.756201	0.756201	MINPP1/PGAM1/LDHA	3
hsa04144	Endocytosis	7/120	251/8112	0.0782534	0.756201	0.756201	ACAP3/RUFY1/LDLRAP1/PSD4/IQSEC2/SNX3/HSPA8	7
hsa04150	mTOR signaling pathway	5/120	155/8112	0.0795181	0.756201	0.756201	MAPKAP1/ATP6V1H/SLC3A2/MAP2K1/ATP6V1B2	5
hsa04215	Apoptosis - multiple species	2/120	32/8112	0.0807524	0.756201	0.756201	DIABLO/CYCS	2
hsa04920	Adipocytokine signaling pathway	3/120	69/8112	0.0819773	0.756201	0.756201	PRKAG3/PRKAB1/ACSL1	3

## Sheet: 24h-GO
Supplement Table 2. Corresponding data of Figure 4C
ID	Description	GeneRatio	BgRatio	pvalue	p.adjust	qvalue	geneID	Count
GO:0016126	sterol biosynthetic process	10/100	81/18866	1.52037e-11	2.85374e-08	2.79268e-08	HSD17B7/NSDHL/ERG28/SQLE/SCD/MSMO1/INSIG1/IDI1/HMGCS1/HMGCR	10
GO:0006900	vesicle budding from membrane	5/100	110/18866	0.000298177	0.0294567	0.0288265	MCFD2/SEC23B/SNX3/INSIG1/DNM1	5
GO:0051701	interaction with host	6/100	212/18866	0.000930043	0.0793496	0.0776519	EXOC7/TNFRSF14/SNX3/TCP1/PPIA/NPC1	6
GO:0006457	protein folding	6/100	230/18866	0.00141324	0.110527	0.108162	TOR2A/CHORDC1/HSPH1/PFDN6/TCP1/PPIA	6
GO:0043433	negative regulation of DNA-binding transcription factor activity	5/100	183/18866	0.00291144	0.171933	0.168255	NLRC3/HES6/MAD2L2/BHLHE40/PKD1	5
GO:0051235	maintenance of location	6/100	324/18866	0.00757426	0.314502	0.307773	STARD4/FTHL17/SQLE/PKD1/INSIG1/CLIC2	6
GO:0045445	myoblast differentiation	3/100	86/18866	0.0107627	0.349493	0.342016	DDX17/MAML1/HMGCR	3
GO:0007338	single fertilization	4/100	162/18866	0.0108575	0.349493	0.342016	GNPDA1/UBXN8/TCP1/HOXA10	4
GO:0016241	regulation of macroautophagy	4/100	176/18866	0.0143481	0.407724	0.399001	ATP6V1H/EXOC7/NPC1/ATP6V1B2	4
GO:0010831	positive regulation of myotube differentiation	2/100	39/18866	0.0181455	0.445576	0.436043	SCGB3A1/MAML1	2
GO:0051348	negative regulation of transferase activity	5/100	296/18866	0.0206768	0.445576	0.436043	CHORDC1/POT1/MAD2L2/MYCNOS/HMGCR	5
GO:0043588	skin development	6/100	425/18866	0.0255684	0.445576	0.436043	LCE1D/LCE1C/NSDHL/TXNIP/PKD1/KRT18	6
GO:0009743	response to carbohydrate	4/100	233/18866	0.0354631	0.445576	0.436043	TXNIP/ME1/HMGCR/EGR1	4
GO:0000381	regulation of alternative mRNA splicing, via spliceosome	2/100	76/18866	0.0615588	0.445576	0.436043	DDX17/WTAP	2
GO:0033209	tumor necrosis factor-mediated signaling pathway	3/100	173/18866	0.0643576	0.445576	0.436043	TNFRSF14/KRT18/FAS	3

## Sheet: 24h-KEGG
Supplement Table 2. Corresponding data of Figure 4D
ID	Description	GeneRatio	BgRatio	pvalue	p.adjust	qvalue	geneID	Count
hsa00100	Steroid biosynthesis	4/53	20/8112	7.28235e-06	0.000946706	0.000919876	HSD17B7/NSDHL/SQLE/MSMO1	4
hsa00900	Terpenoid backbone biosynthesis	3/53	22/8112	0.000371512	0.0241483	0.0234639	IDI1/HMGCS1/HMGCR	3
hsa03320	PPAR signaling pathway	4/53	75/8112	0.00140115	0.0526765	0.0511836	ME3/SCD/ME1/HMGCS1	4
hsa04721	Synaptic vesicle cycle	4/53	78/8112	0.00162081	0.0526765	0.0511836	ATP6V1H/STX3/DNM1/ATP6V1B2	4
hsa05120	Epithelial cell signaling in Helicobacter pylori infection	3/53	70/8112	0.0105936	0.229672	0.223163	JAM3/ATP6V1H/ATP6V1B2	3
hsa04142	Lysosome	4/53	132/8112	0.0106002	0.229672	0.223163	ATP6V1H/NPC1/NEU1/M6PR	4
hsa04145	Phagosome	4/53	152/8112	0.0170468	0.316583	0.307611	TUBA3D/ATP6V1H/M6PR/ATP6V1B2	4
hsa00620	Pyruvate metabolism	2/53	47/8112	0.0375492	0.542377	0.527006	ME3/ME1	2
hsa00240	Pyrimidine metabolism	2/53	58/8112	0.054882	0.612902	0.595532	UPP1/DCTD	2
hsa04330	Notch signaling pathway	2/53	59/8112	0.0565756	0.612902	0.595532	MAML1/DVL2	2
hsa04150	mTOR signaling pathway	3/53	155/8112	0.0802532	0.745208	0.724089	ATP6V1H/DVL2/ATP6V1B2	3
hsa04141	Protein processing in endoplasmic reticulum	3/53	171/8112	0.100536	0.78074	0.758614	HSPH1/SEC23B/UBXN8	3
hsa04060	Cytokine-cytokine receptor interaction	4/53	295/8112	0.125888	0.78074	0.758614	IL17RE/TNFRSF14/FAS/ACVR1	4
